# Supplementary material for: Evaluating the Contribution of Lean Construction to Achieving Sustainable Development Goals
Source: MDPI journal article supplement (doi:10.3390/su16083502), 2024-04-22
Supplement: s1 [file s1]

## Supplementary Materials S1

### Interaction Matrix Development - Literature reviews

|                                                                                                                             |     | L1                                               | L2                      | L3                                              | L4                  | L5                                           | L6                                       | L7                                                  | L8                      | L9                                                | L10                                               | L11                                               |
|-----------------------------------------------------------------------------------------------------------------------------|-----|--------------------------------------------------|-------------------------|-------------------------------------------------|---------------------|----------------------------------------------|------------------------------------------|-----------------------------------------------------|-------------------------|---------------------------------------------------|---------------------------------------------------|---------------------------------------------------|
| SDGs                                                                                                                        |     | Reducing non-value adding activities             | Focus on customer needs | Reducing diversity and uncertainty in processes | Reducing cycle time | Simplifying processes, components, materials | Increasing production output flexibility | Increasing the transparency of production processes | Focus on all processes. | Integrating continuous improvement into processes | Analyze and optimize workflows before they change | Comparison for weakness and superiority detection |
| SDG1 End poverty in all its forms everywhere                                                                                |     |                                                  |                         |                                                 |                     |                                              |                                          |                                                     |                         |                                                   |                                                   |                                                   |
| International poverty                                                                                                       | 1.1 |                                                  | 38                      |                                                 |                     |                                              |                                          |                                                     |                         | 32                                                |                                                   |                                                   |
| SDG2 with SDG3 End hunger, achieve food security and improved nutrition and promote sustainable agriculture                 |     |                                                  |                         |                                                 |                     |                                              |                                          |                                                     |                         |                                                   |                                                   |                                                   |
| SDG3 Ensure healthy lives and promote well-being for all at all ages                                                        |     |                                                  |                         |                                                 |                     |                                              |                                          |                                                     |                         |                                                   |                                                   |                                                   |
| Reduce mortality from non-communicable diseases through prevention and treatment, and promote health and wellbeing          | 3.4 | 36                                               | 36; 23                  |                                                 |                     |                                              |                                          |                                                     |                         |                                                   |                                                   |                                                   |
| SDG4 Ensure inclusive and equitable quality education and promote lifelong learning opportunities for all                   |     |                                                  |                         |                                                 |                     |                                              |                                          |                                                     |                         |                                                   |                                                   |                                                   |
| Ensure that all learners acquire the knowledge and skills needed to promote sustainable development.                        | 4.7 |                                                  | 29,14                   |                                                 |                     |                                              |                                          | 12, 19                                              |                         | 1,12, 19,14                                       |                                                   |                                                   |
| SDG5 Achieve gender equality and empower all women and girls                                                                |     |                                                  |                         |                                                 |                     |                                              |                                          |                                                     |                         |                                                   |                                                   |                                                   |
| SDG6 Ensure availability and sustainable management of water and sanitation for all                                         |     |                                                  |                         |                                                 |                     |                                              |                                          |                                                     |                         |                                                   |                                                   |                                                   |
| Improve water quality by reducing pollution, and substantially increasing recycling and safe reuse                          | 6.3 | 29                                               | 29                      |                                                 |                     |                                              |                                          |                                                     |                         |                                                   |                                                   |                                                   |
| Increase water-use efficiency across all sectors                                                                            | 6.4 |                                                  |                         |                                                 |                     |                                              |                                          |                                                     |                         |                                                   |                                                   |                                                   |
| Integrated water resources management at all levels,                                                                        | 6.5 |                                                  |                         |                                                 |                     |                                              |                                          |                                                     |                         |                                                   |                                                   |                                                   |
| Protect and restore water-related ecosystems, including mountains, forests                                                  | 6.6 |                                                  |                         |                                                 |                     |                                              |                                          |                                                     |                         |                                                   |                                                   |                                                   |
| SDG7 Ensure access to affordable, reliable, sustainable, and modern energy for all                                          |     |                                                  |                         |                                                 |                     |                                              |                                          |                                                     |                         |                                                   |                                                   |                                                   |
| Ensure universal access to affordable, reliable, and modern energy services                                                 | 7.1 |                                                  | 38                      |                                                 |                     |                                              |                                          |                                                     |                         |                                                   |                                                   |                                                   |
| Double the global rate of improvement in energy efficiency                                                                  | 7.3 | 4, 3, 14                                         | 14                      |                                                 |                     |                                              |                                          |                                                     |                         | 1, 16, 14                                         |                                                   |                                                   |
| SDG8 Promote sustained, inclusive, and sustainable economic growth, full and productive employment, and decent work for all |     |                                                  |                         |                                                 |                     |                                              |                                          |                                                     |                         |                                                   |                                                   |                                                   |
| Add value by increase productivity                                                                                          | 8.2 | 2,13, 14 20, 25,29, 19                           | 13, 20,25, 19, 14       |                                                 |                     |                                              | 14                                       |                                                     | 14                      | 1, 12,24,14                                       | 12                                                | 14                                                |
| Improve global resource efficiency in consumption and production                                                            | 8.4 | 2,3,4,5, 10,11, 14, 17, 20, 23,24, 35,33,3 4, 38 | 14                      | 20, 31,19                                       |                     |                                              | 14                                       |                                                     | 1, 31,14                | 14                                                |                                                   | 38                                                |
| Protect labour rights and promote safe and secure working environments                                                      | 8.8 |                                                  | 23                      |                                                 |                     |                                              |                                          |                                                     |                         |                                                   |                                                   |                                                   |

Social S
  Environmental E
  Economical EC

### Supplementary Materials S1 Interaction Matrix Development - Literature reviews(cont.)

|                                                                                                                                        |      | L1                                             | L2                      | L3                                              | L4                     | L5                                           | L6                                       | L7                                                  | L8                      | L9                                                | L10                                               | L11                                               |
|----------------------------------------------------------------------------------------------------------------------------------------|------|------------------------------------------------|-------------------------|-------------------------------------------------|------------------------|----------------------------------------------|------------------------------------------|-----------------------------------------------------|-------------------------|---------------------------------------------------|---------------------------------------------------|---------------------------------------------------|
| SDGs                                                                                                                                   |      | Reducing non-value adding activities           | Focus on customer needs | Reducing diversity and uncertainty in processes | Reducing cycle time    | Simplifying processes, components, materials | Increasing production output flexibility | Increasing the transparency of production processes | Focus on all processes. | Integrating continuous improvement into processes | Analyze and optimize workflows before they change | Comparison for weakness and superiority detection |
| SDG9 Build resilient infrastructure, promote inclusive and sustainable industrialization and foster innovation                         |      |                                                |                         |                                                 |                        |                                              |                                          |                                                     |                         |                                                   |                                                   |                                                   |
| Promote inclusive and sustainable Industrialization                                                                                    | 9.2  | 3,11,17,14 ,27, 33,34,38                       | 13,14, 17, 20, 19       | 37, 19                                          | 6,7, 9, 11, 27, 31, 30 | 9                                            | 14                                       |                                                     | 1,12, 14, 27,31, 30     | 12, 37, 19,14                                     |                                                   | 14,38                                             |
| Upgrade infrastructure and retrofit industries to make them sustainable, with increased resource-use efficiency                        | 9.4  | 23, 14                                         | 14                      |                                                 |                        |                                              | 14                                       |                                                     | 12, 14                  | 1,8, 12, 14, 19                                   |                                                   |                                                   |
| Enhance scientific research, upgrade the technological capabilities of industrial sectors                                              | 9.5  | 14                                             | 14                      |                                                 |                        |                                              | 14                                       |                                                     | 14                      | 1,8, 12,14                                        |                                                   | 28                                                |
| SDG10 Reduce inequality within and among countries                                                                                     |      |                                                |                         |                                                 |                        |                                              |                                          |                                                     |                         |                                                   |                                                   |                                                   |
| SDG11 Make cities and human settlements inclusive, safe, resilient, and sustainably                                                    |      |                                                |                         |                                                 |                        |                                              |                                          |                                                     |                         |                                                   |                                                   |                                                   |
| Reduce the adverse per capita environmental impact of cities, paying attention to air quality and municipal and other waste management | 11.6 | 15, 1, 2, 3, 4, 5, 11, 14, 17, 18, 19, 24, 27, | 1,14,15 , 17, 25,27,3 9 |                                                 | 27, 30,20,13           |                                              | 20,13,14                                 | 26                                                  | 16,14                   | 14                                                |                                                   |                                                   |
| SDG12 Sustainable consumption and production patterns                                                                                  |      |                                                |                         |                                                 |                        |                                              |                                          |                                                     |                         |                                                   |                                                   |                                                   |

|                                                                                                                      |      |                                                            |                         |            |       |    |              |           |                       |           |  |                   |
|----------------------------------------------------------------------------------------------------------------------|------|------------------------------------------------------------|-------------------------|------------|-------|----|--------------|-----------|-----------------------|-----------|--|-------------------|
| 4Achieve the sustainable management and efficient use of natural resources                                           | 12.2 | 2, 3, 10, 11, 14, 19, 33,34,35,38                          |                         | 20, 31, 19 | 7, 31 | 9  | 1, 21, 31,14 | 12,26, 19 | 12,14, 16, 17, 30, 31 | 1, 14, 19 |  | 34,38             |
| Achieve the environmentally sound management of chemicals and all wastes throughout their life cycle                 | 12.4 | 3, 10, 11, 18, 30,38                                       | 4, 13, 30               |            |       |    |              |           |                       |           |  | 22, 33, 34, 35,38 |
| Substantially reduce waste generation                                                                                | 12.5 | 14,15, 2, 3, 8, 10, 11, 18,19,22, 24, 30, 33, 34,35, 30,38 | 2, 4, 13, 20, 27, 32,39 | 20, 31,19  | 31,30 | 31 |              | 19        | 16, 31                |           |  | 33, 34,38         |
| Encourage companies to adopt sustainable practices                                                                   | 12.6 |                                                            | 2,                      |            |       |    |              |           | 16                    |           |  | 8, 28             |
| Promote public procurement practices that are sustainable                                                            | 12.7 | 17                                                         |                         |            |       | 17 |              |           | 17                    |           |  |                   |
| people have the relevant information and awareness for sustainable development and lifestyles in harmony with nature | 12.8 | 36,14                                                      | 1,4,14                  |            |       |    |              | 12,26     | 16,14 17              | 32,14     |  | 22, 34            |

 **Social S**
 **Environmental E**
 **Economical EC**

### Supplementary Materials S1: Interaction Matrix Development - Literature reviews(cont.)

|                                                                                                                                          |       | L1                                                     | L2                            | L3                                                                 | L4                         | L5                                                           | L6                                                | L7                                                               | L8                                | L9                                                             | L10                                                              | L11                                                                   |
|------------------------------------------------------------------------------------------------------------------------------------------|-------|--------------------------------------------------------|-------------------------------|--------------------------------------------------------------------|----------------------------|--------------------------------------------------------------|---------------------------------------------------|------------------------------------------------------------------|-----------------------------------|----------------------------------------------------------------|------------------------------------------------------------------|-----------------------------------------------------------------------|
| SDGs                                                                                                                                     |       | Reduci<br>ng non-<br>value<br>adding<br>activiti<br>es | Focus on<br>customer<br>needs | Reduci<br>ng diversit<br>y and uncerta<br>inty in<br>process<br>es | Reduci<br>ng cycle<br>time | Simplif<br>ying process<br>es, compo<br>nents, materia<br>ls | Increasing<br>production<br>output<br>flexibility | Increasing<br>the transparen<br>cy of<br>production<br>processes | Focus<br>on all<br>process<br>es. | Integrating<br>continuous<br>improvem<br>ent into<br>processes | Analyz<br>e and optimiz<br>e workflo<br>ws before<br>they change | Comparis<br>on for<br>weakness<br>and<br>superiorit<br>y<br>detection |
| <b>SDG13 Take urgent action to combat climate change and its impacts</b>                                                                 |       |                                                        |                               |                                                                    |                            |                                                              |                                                   |                                                                  |                                   |                                                                |                                                                  |                                                                       |
| <b>SDG 14 Conserve and sustainably use the oceans, seas, and marine resources for sustainable development</b>                            |       |                                                        |                               |                                                                    |                            |                                                              |                                                   |                                                                  |                                   |                                                                |                                                                  |                                                                       |
| <b>SDG15 Protect, restore, and promote sustainable use of terrestrial ecosystems,</b>                                                    |       |                                                        |                               |                                                                    |                            |                                                              |                                                   |                                                                  |                                   |                                                                |                                                                  |                                                                       |
| <b>SDG16 Promote peaceful and inclusive societies for sustainable development, provide access to justice for all</b>                     |       |                                                        |                               |                                                                    |                            |                                                              |                                                   |                                                                  |                                   |                                                                |                                                                  |                                                                       |
| <b>SDG17 Strengthen the means of implementation and revitalize the Global Partnership for Sustainable Development</b>                    |       |                                                        |                               |                                                                    |                            |                                                              |                                                   |                                                                  |                                   |                                                                |                                                                  |                                                                       |
| Strengthen domestic resource mobilization, tax, and other revenue collection                                                             | 17.1  |                                                        | 6                             |                                                                    |                            |                                                              |                                                   |                                                                  |                                   |                                                                |                                                                  |                                                                       |
| Implement investment promotion                                                                                                           | 17.5  |                                                        | 16, 22,34                     |                                                                    |                            | 16                                                           |                                                   |                                                                  |                                   |                                                                |                                                                  | 16                                                                    |
| Promote the development, transfer, dissemination, and diffusion of environmentally sound technologies                                    | 17.7  |                                                        | 1,16, 34,14                   |                                                                    |                            |                                                              |                                                   |                                                                  | 12,                               | 12,14                                                          |                                                                  |                                                                       |
| Enhance international support for implementing effective                                                                                 | 17.9  |                                                        | 16                            |                                                                    |                            |                                                              |                                                   |                                                                  |                                   |                                                                |                                                                  |                                                                       |
| Enhance policy coherence for sustainable development                                                                                     | 17.14 |                                                        | 16 ,34                        |                                                                    |                            |                                                              |                                                   |                                                                  |                                   |                                                                |                                                                  |                                                                       |
| Enhance the global partnership for sustainable development,                                                                              | 17.16 |                                                        | 36                            |                                                                    |                            |                                                              |                                                   |                                                                  |                                   |                                                                |                                                                  |                                                                       |
| Encourage and promote effective public, public-private and civil society partnerships                                                    | 17.17 |                                                        | 39                            |                                                                    |                            |                                                              |                                                   |                                                                  |                                   |                                                                |                                                                  |                                                                       |
| Build on existing initiatives to develop measurements of progress on sustainable development that complement the gross domestic product. | 17.19 |                                                        | 16                            |                                                                    |                            |                                                              |                                                   |                                                                  |                                   |                                                                | 34                                                               | 16, 34                                                                |

 **Social S**
 **Environmental E**
 **Economical EC**

1- [46], 2- [74], 3- [19] , 4- [72], 5- [77] , 6- [78], 7- [79], 8- [76], 9- [22] , 10- [81] 11- [75], 12- [82], 13- [83] , 14- [73], 15- [85] , 16- [86], 17- [87], 18- [88], 19- [89], 20- [90], 21- [91], 22- [92], 23- [14], 24- [93], 25- [94], 26- [95], 27- [96], 28- [100], 29- [98], 30- [99], 31- [43], 32- [42], 33- [80], 34- [101], 35- [45], 36- [39], 37- [21], 38-[101], 39- [102].

### Supplementary Materials S2 (Delphi Survey)

1. Delphi Survey: Interaction Matrix between Sustainable Development Goals (SDGs) and Lean Construction (LC)

In the table presented below, the interaction between LC and SDGs is shown with coloured cells. This interaction has been identified through a literature review and focus group discussions conducted specifically in the construction industry, as mentioned above.

Therefore, you are expected to evaluate the interaction level on a scale of 1 to 5 to indicate the level of interaction, where 1 represents very low interaction and 5 represents very high interaction. You may also provide comments to support your evaluation.

(1- Very low interaction, 2- Low interaction, 3- Moderate interaction, 4- Significant interaction, 5- Very high interaction).

|                                                                                                      |                                                                                               | L1 | L2 | L3 | L4 | L5 | L6 | L7 | L8 | L9 | L10 | L11 |
|------------------------------------------------------------------------------------------------------|-----------------------------------------------------------------------------------------------|----|----|----|----|----|----|----|----|----|-----|-----|
| <b>SDG1</b>                                                                                          |                                                                                               |    |    |    |    |    |    |    |    |    |     |     |
| <b>End poverty in all its forms everywhere</b>                                                       |                                                                                               |    |    |    |    |    |    |    |    |    |     |     |
| 1                                                                                                    | 1.1 Eliminate extreme poverty by 2030.                                                        |    |    |    |    |    |    |    |    |    |     |     |
|                                                                                                      | 1.2 Halve global poverty by 2030.                                                             |    |    |    |    |    |    |    |    |    |     |     |
|                                                                                                      | 1.3 Providing social protection systems to all nations to alleviate poverty and vulnerability |    |    |    |    |    |    |    |    |    |     |     |
|                                                                                                      | 1.4 To ensure equal economic rights for all women and men.                                    |    |    |    |    |    |    |    |    |    |     |     |
| <b>Goal 2: End hunger, improve food security and nutrition, and promote sustainable agriculture.</b> |                                                                                               |    |    |    |    |    |    |    |    |    |     |     |

|                                                                                                                                        |                                                                                                                                  |  |  |  |  |  |  |  |  |  |  |  |  |  |
|----------------------------------------------------------------------------------------------------------------------------------------|----------------------------------------------------------------------------------------------------------------------------------|--|--|--|--|--|--|--|--|--|--|--|--|--|
| 2                                                                                                                                      | 2.1 End hunger and ensure access to food for all.                                                                                |  |  |  |  |  |  |  |  |  |  |  |  |  |
|                                                                                                                                        | 2.3 Doubling the productivity of small-scale food producers by providing access to the resources needed for production.          |  |  |  |  |  |  |  |  |  |  |  |  |  |
|                                                                                                                                        | 2.4 Implementing sustainable food production systems and methods to increase productivity.                                       |  |  |  |  |  |  |  |  |  |  |  |  |  |
|                                                                                                                                        | 2.5 To preserve the genetic diversity of species.                                                                                |  |  |  |  |  |  |  |  |  |  |  |  |  |
| <b>Goal 3: To promote and ensure healthy living at all ages.</b>                                                                       |                                                                                                                                  |  |  |  |  |  |  |  |  |  |  |  |  |  |
| 3                                                                                                                                      | 3.4 Reducing deaths from noncommunicable diseases by one third.                                                                  |  |  |  |  |  |  |  |  |  |  |  |  |  |
|                                                                                                                                        | 3.9 To reduce deaths and diseases caused by pollution.                                                                           |  |  |  |  |  |  |  |  |  |  |  |  |  |
| <b>Goal 4: To provide inclusive and equitable quality education for all and to promote lifelong learning opportunities.</b>            |                                                                                                                                  |  |  |  |  |  |  |  |  |  |  |  |  |  |
| 4                                                                                                                                      | 4.5 Eliminate gender discrimination in women's education.                                                                        |  |  |  |  |  |  |  |  |  |  |  |  |  |
|                                                                                                                                        | 4.7 Provide the information and education needed to promote sustainable development                                              |  |  |  |  |  |  |  |  |  |  |  |  |  |
| <b>Goal 5: To achieve gender equality and empower all women and girls.</b>                                                             |                                                                                                                                  |  |  |  |  |  |  |  |  |  |  |  |  |  |
| 5                                                                                                                                      | 5.1 End all forms of discrimination against women.                                                                               |  |  |  |  |  |  |  |  |  |  |  |  |  |
|                                                                                                                                        | 5.2 Eliminate all violence against women.                                                                                        |  |  |  |  |  |  |  |  |  |  |  |  |  |
|                                                                                                                                        | 5.3 Ending harmful practices against women (e.g., early marriage)                                                                |  |  |  |  |  |  |  |  |  |  |  |  |  |
|                                                                                                                                        | 5.4 Recognize and value unpaid housework.                                                                                        |  |  |  |  |  |  |  |  |  |  |  |  |  |
|                                                                                                                                        | 5.5 Enabling women's participation in decision-making processes and encouraging their leadership.                                |  |  |  |  |  |  |  |  |  |  |  |  |  |
|                                                                                                                                        | 5.6 Ensuring universal access to reproductive rights                                                                             |  |  |  |  |  |  |  |  |  |  |  |  |  |
| <b>Goal 6: Ensure availability and sustainable management of water and sanitation for all</b>                                          |                                                                                                                                  |  |  |  |  |  |  |  |  |  |  |  |  |  |
| 6                                                                                                                                      | 6.1 Ensuring universal access to safe water.                                                                                     |  |  |  |  |  |  |  |  |  |  |  |  |  |
|                                                                                                                                        | 6.2 Ensuring access to sanitation and hygiene.                                                                                   |  |  |  |  |  |  |  |  |  |  |  |  |  |
|                                                                                                                                        | 6.3 Enhance water by reducing pollution, minimizing the release of hazardous chemicals and materials, etc. improve water quality |  |  |  |  |  |  |  |  |  |  |  |  |  |
|                                                                                                                                        | 6.4 Increasing water use efficiency and sustainability.                                                                          |  |  |  |  |  |  |  |  |  |  |  |  |  |
|                                                                                                                                        | 6.5 To provide integrated water resources management.                                                                            |  |  |  |  |  |  |  |  |  |  |  |  |  |
|                                                                                                                                        | 6.6 To protect and restore aquatic ecosystems.                                                                                   |  |  |  |  |  |  |  |  |  |  |  |  |  |
| <b>Goal 7: Ensure access to affordable, reliable, sustainable, and modern energy for all.</b>                                          |                                                                                                                                  |  |  |  |  |  |  |  |  |  |  |  |  |  |
| 7                                                                                                                                      | 7.1 Ensure universal access to cost-effective energy for all.                                                                    |  |  |  |  |  |  |  |  |  |  |  |  |  |
|                                                                                                                                        | 7.2 Increasing the share of renewable energy.                                                                                    |  |  |  |  |  |  |  |  |  |  |  |  |  |
|                                                                                                                                        | 7.3 Doubling energy efficiency in sectors.                                                                                       |  |  |  |  |  |  |  |  |  |  |  |  |  |
| <b>Goal 8: Promote sustained, inclusive, and sustainable economic growth, full and productive employment, and decent work for all.</b> |                                                                                                                                  |  |  |  |  |  |  |  |  |  |  |  |  |  |
| 8                                                                                                                                      | 8.1 Sustainability of economic growth (7%) in all countries.                                                                     |  |  |  |  |  |  |  |  |  |  |  |  |  |
|                                                                                                                                        | 8.2 Increasing economic productivity through innovation, technological advancement, etc.                                         |  |  |  |  |  |  |  |  |  |  |  |  |  |
|                                                                                                                                        | 8.4 Gradual improvement of global resource efficiency in production and consumption                                              |  |  |  |  |  |  |  |  |  |  |  |  |  |
|                                                                                                                                        | 8.5 To ensure full employment and equal pay for equal work.                                                                      |  |  |  |  |  |  |  |  |  |  |  |  |  |
|                                                                                                                                        | 8.6 Reducing youth unemployment and closing educational gaps.                                                                    |  |  |  |  |  |  |  |  |  |  |  |  |  |
|                                                                                                                                        | 8.7 End forced labor and exploitation of child labor.                                                                            |  |  |  |  |  |  |  |  |  |  |  |  |  |
|                                                                                                                                        | 8.8 Protect workers' rights and promote safe environments.                                                                       |  |  |  |  |  |  |  |  |  |  |  |  |  |

## Delphi Survey(cont.)

|                                                                                                                                                                                                      |                                                                                            | L1 | L2 | L3 | L4 | L5 | L6 | L7 | L8 | L9 | L10 | L11 |
|------------------------------------------------------------------------------------------------------------------------------------------------------------------------------------------------------|--------------------------------------------------------------------------------------------|----|----|----|----|----|----|----|----|----|-----|-----|
| <b>Goal 9: Build resilient infrastructure, promote inclusive and sustainable industrialization, and support innovation</b>                                                                           |                                                                                            |    |    |    |    |    |    |    |    |    |     |     |
| 9                                                                                                                                                                                                    | 9.1 Developing sustainable, resilient infrastructure for all.                              |    |    |    |    |    |    |    |    |    |     |     |
|                                                                                                                                                                                                      | 9.2 Increasing the employment and GDP share of industry with industrialization incentives. |    |    |    |    |    |    |    |    |    |     |     |
|                                                                                                                                                                                                      | 9.3 Improving small business access to financial services.                                 |    |    |    |    |    |    |    |    |    |     |     |
|                                                                                                                                                                                                      | 9.4 Updating infrastructure and industry for sustainability.                               |    |    |    |    |    |    |    |    |    |     |     |
|                                                                                                                                                                                                      | 9.5 Increasing technological competencies, increasing research and development.            |    |    |    |    |    |    |    |    |    |     |     |
| <b>Goal 10: Reducing inequality between countries</b>                                                                                                                                                |                                                                                            |    |    |    |    |    |    |    |    |    |     |     |
| 10                                                                                                                                                                                                   | Promote social, economic, political inclusion                                              |    |    |    |    |    |    |    |    |    |     |     |
| 0                                                                                                                                                                                                    | 3 Ensuring equal opportunities by making legal, political and action changes.              |    |    |    |    |    |    |    |    |    |     |     |
| <b>Goal 11: Make cities and human settlements inclusive, safe, resilient, and sustainable.</b>                                                                                                       |                                                                                            |    |    |    |    |    |    |    |    |    |     |     |
| 11                                                                                                                                                                                                   | 11.1 Providing safe, affordable, adequate housing.                                         |    |    |    |    |    |    |    |    |    |     |     |
|                                                                                                                                                                                                      | 11.2 Ensuring accessible, sustainable transport for all.                                   |    |    |    |    |    |    |    |    |    |     |     |
|                                                                                                                                                                                                      | 11.3 Developing sustainable urban transformation and planning.                             |    |    |    |    |    |    |    |    |    |     |     |
|                                                                                                                                                                                                      | 11.5 Reducing disaster-related deaths and economic losses.                                 |    |    |    |    |    |    |    |    |    |     |     |
|                                                                                                                                                                                                      | 11.6 Reducing the environmental impact of cities.                                          |    |    |    |    |    |    |    |    |    |     |     |
|                                                                                                                                                                                                      | 11.7 Providing safe, accessible, green public spaces.                                      |    |    |    |    |    |    |    |    |    |     |     |
|                                                                                                                                                                                                      |                                                                                            |    |    |    |    |    |    |    |    |    |     |     |
| <b>Goal 12: To provide sustainable consumption and production models.</b>                                                                                                                            |                                                                                            |    |    |    |    |    |    |    |    |    |     |     |
| 12                                                                                                                                                                                                   | 12.1 To apply sustainable consumption and production models.                               |    |    |    |    |    |    |    |    |    |     |     |
|                                                                                                                                                                                                      | 12.2 To manage natural resources efficiently.                                              |    |    |    |    |    |    |    |    |    |     |     |
|                                                                                                                                                                                                      | 12.3 Reducing food waste and losses.                                                       |    |    |    |    |    |    |    |    |    |     |     |
|                                                                                                                                                                                                      | 12.4 Managing chemicals and waste sustainably                                              |    |    |    |    |    |    |    |    |    |     |     |
|                                                                                                                                                                                                      | 12.5 Reducing waste through prevention, reduction, recycling, and reuse                    |    |    |    |    |    |    |    |    |    |     |     |
|                                                                                                                                                                                                      | 12.6 Promoting sustainable business practices                                              |    |    |    |    |    |    |    |    |    |     |     |
|                                                                                                                                                                                                      | 12.7 Supporting sustainable public procurement policies                                    |    |    |    |    |    |    |    |    |    |     |     |
|                                                                                                                                                                                                      | 12.8 Increasing awareness and knowledge on sustainable development                         |    |    |    |    |    |    |    |    |    |     |     |
| <b>Goal 13: Take urgent action to combat climate change and its effects.</b>                                                                                                                         |                                                                                            |    |    |    |    |    |    |    |    |    |     |     |
| 13                                                                                                                                                                                                   | 13.2 Integrating climate change into national policies.                                    |    |    |    |    |    |    |    |    |    |     |     |
| 3                                                                                                                                                                                                    | 13.3 To increase education and capacity on climate change.                                 |    |    |    |    |    |    |    |    |    |     |     |
| <b>Goal 14: Promote the sustainable conservation and use of the seas and marine resources.</b>                                                                                                       |                                                                                            |    |    |    |    |    |    |    |    |    |     |     |
| 14                                                                                                                                                                                                   | 14.1 To reduce marine pollution from land-based activities.                                |    |    |    |    |    |    |    |    |    |     |     |
| <b>Goal 15: Sustainably manage terrestrial ecosystems and forests, prevent desertification, halt soil degradation and halt, protect and promote biodiversity loss.</b>                               |                                                                                            |    |    |    |    |    |    |    |    |    |     |     |
| 15                                                                                                                                                                                                   | 15.1 To protect and restore land and freshwater ecosystems.                                |    |    |    |    |    |    |    |    |    |     |     |
|                                                                                                                                                                                                      | 15.4 Protecting Mountain ecosystems and biodiversity.                                      |    |    |    |    |    |    |    |    |    |     |     |
|                                                                                                                                                                                                      | 15.5 Reducing the degradation of natural habitats.                                         |    |    |    |    |    |    |    |    |    |     |     |
|                                                                                                                                                                                                      | 15.8 To prevent the introduction and influence of alien species.                           |    |    |    |    |    |    |    |    |    |     |     |
| <b>Goal 16: Promote peaceful and inclusive societies for sustainable development, ensure access to justice for all, and create effective, accountable, and inclusive institutions at all levels.</b> |                                                                                            |    |    |    |    |    |    |    |    |    |     |     |
| 16                                                                                                                                                                                                   | 16.3 Promote the rule of law and ensure equal justice for all.                             |    |    |    |    |    |    |    |    |    |     |     |



## Factor Analysis

**KMO and Bartlett's Test**

|                                                  |                    |
|--------------------------------------------------|--------------------|
| Kaiser-Meyer-Olkin Measure of Sampling Adequacy. | .970               |
| Bartlett's Test of Sphericity                    | Approx. Chi-Square |
|                                                  | 5.780E3            |
|                                                  | df                 |
|                                                  | 45                 |
|                                                  | Sig.               |
|                                                  | .000               |

**Communalities**

|          | Initial | Extraction |
|----------|---------|------------|
| Expert1  | 1.000   | .814       |
| Exper2   | 1.000   | .833       |
| Expert3  | 1.000   | .761       |
| Expert4  | 1.000   | .776       |
| Expert5  | 1.000   | .745       |
| Expert6  | 1.000   | .766       |
| Expert7  | 1.000   | .852       |
| Expert8  | 1.000   | .847       |
| Expert9  | 1.000   | .859       |
| Expert10 | 1.000   | .894       |

Extraction Method: Principal  
Component Analysis.

**Component Matrix<sup>a</sup>**

|          | Component |
|----------|-----------|
|          | 1         |
| Expert1  | .902      |
| Exper2   | .913      |
| Expert3  | .872      |
| Expert4  | .881      |
| Expert5  | .863      |
| Expert6  | .875      |
| Expert7  | .923      |
| Expert8  | .920      |
| Expert9  | .927      |
| Expert10 | .945      |

Extraction Method:  
Principal Component  
Analysis.

a. 1 components extracted.

## Total Variance Explanation

| Compo<br>nent | Initial Eigenvalues |               |              | Extraction Sums of Squared Loadings |               |              |
|---------------|---------------------|---------------|--------------|-------------------------------------|---------------|--------------|
|               | Total               | % of Variance | Cumulative % | Total                               | % of Variance | Cumulative % |
| 1             | 8.146               | 81.459        | 81.459       | 8.146                               | 81.459        | 81.459       |
| 2             | .351                | 3.512         | 84.971       |                                     |               |              |
| 3             | .305                | 3.046         | 88.018       |                                     |               |              |
| 4             | .248                | 2.482         | 90.499       |                                     |               |              |
| 5             | .212                | 2.119         | 92.619       |                                     |               |              |
| 6             | .176                | 1.765         | 94.383       |                                     |               |              |
| 7             | .173                | 1.728         | 96.111       |                                     |               |              |
| 8             | .154                | 1.543         | 97.654       |                                     |               |              |
| 9             | .128                | 1.283         | 98.937       |                                     |               |              |
| 10            | .106                | 1.063         | 100.000      |                                     |               |              |

Extraction Method: Principal Component Analysis.

## Supplementary Materials S5 : ( Second round of the Delphi survey)

The interactions for the second round of the Delphi survey

|     | Interaction | M   | SD   | CV   | Rank | Significance |
|-----|-------------|-----|------|------|------|--------------|
| 1   | 6.2L2       | 5   | 0    | 0    | 1    | Ext.Imp.     |
| 2   | 6.2L8       | 5   | 0    | 0    | 1    | Ext.Imp.     |
| 3   | 8.2L1       | 5   | 0    | 0    | 1    | Ext.Imp.     |
| 4   | 12.7L8      | 5   | 0    | 0    | 1    | Ext.Imp.     |
| 5   | 12.7L9      | 5   | 0    | 0    | 1    | Ext.Imp.     |
| 6   | 8.2L4       | 4.9 | 0.32 | 0.07 | 2    | Ext.Imp.     |
| 7   | 8.2L8       | 4.9 | 0.32 | 0.07 | 2    | Ext.Imp.     |
| 8   | 8.2L9       | 4.9 | 0.32 | 0.07 | 2    | Ext.Imp.     |
| 9   | 8.2L10      | 4.9 | 0.32 | 0.07 | 2    | Ext.Imp.     |
| 10  | 12.2L1      | 4.9 | 0.32 | 0.07 | 2    | Ext.Imp.     |
| 11  | 12.5L10     | 4.9 | 0.32 | 0.07 | 2    | Ext.Imp.     |
| 12  | 12.8L5      | 4.9 | 0.32 | 0.07 | 2    | Ext.Imp.     |
| 13  | 12.8L8      | 4.9 | 0.32 | 0.07 | 2    | Ext.Imp.     |
| 14  | 12.8L9      | 4.9 | 0.32 | 0.07 | 2    | Ext.Imp.     |
| 15  | 11.1L2      | 4.8 | 0.42 | 0.09 | 3    | Ext.Imp.     |
| 16  | 11.7L8      | 4.8 | 0.42 | 0.09 | 3    | Ext.Imp.     |
| 17  | 12.1L8      | 4.8 | 0.42 | 0.09 | 3    | Ext.Imp.     |
| 18  | 12.1L9      | 4.8 | 0.42 | 0.09 | 3    | Ext.Imp.     |
| 19  | 12.2L5      | 4.8 | 0.42 | 0.09 | 3    | Ext.Imp.     |
| 20  | 12.2L8      | 4.8 | 0.42 | 0.09 | 3    | Ext.Imp.     |
| 21  | 12.2L9      | 4.8 | 0.42 | 0.09 | 3    | Ext.Imp.     |
| 22  | 12.7L5      | 4.8 | 0.42 | 0.09 | 3    | Ext.Imp.     |
| 23  | 12.7L7      | 4.8 | 0.42 | 0.09 | 3    | Ext.Imp.     |
| 24  | 12.8L7      | 4.8 | 0.42 | 0.09 | 3    | Ext.Imp.     |
| 25  | 16.5L7      | 4.8 | 0.42 | 0.09 | 3    | Ext.Imp.     |
| 26  | 7.3L9       | 4.8 | 0.42 | 0.09 | 3    | Ext.Imp.     |
| 27  | 11.3L9      | 4.8 | 0.42 | 0.09 | 3    | Ext.Imp.     |
| 28  | 11.5L7      | 4.8 | 0.42 | 0.09 | 3    | Ext.Imp.     |
| 29  | 11.6L5      | 4.7 | 0.48 | 0.1  | 4    | Ext.Imp.     |
| 30  | 11.6L9      | 4.7 | 0.48 | 0.1  | 4    | Ext.Imp.     |
| 31  | 12.1L5      | 4.7 | 0.48 | 0.1  | 4    | Ext.Imp.     |
| 32  | 12.5L9      | 4.7 | 0.48 | 0.1  | 4    | Ext.Imp.     |
| 33  | 15.4L5      | 4.7 | 0.48 | 0.1  | 4    | Ext.Imp.     |
| 34  | 11.6L8      | 4.7 | 0.48 | 0.1  | 4    | Ext.Imp.     |
| 35  | 12.2L7      | 4.7 | 0.48 | 0.1  | 4    | Ext.Imp.     |
| 36  | 1L8         | 4.7 | 0.48 | 0.1  | 4    | Ext.Imp.     |
| 37  | 15.1L8      | 4.7 | 0.48 | 0.1  | 4    | Ext.Imp.     |
| 38  | 15.4L1      | 4.7 | 0.48 | 0.1  | 4    | Ext.Imp.     |
| 39  | 17.19L9     | 4.7 | 0.48 | 0.1  | 4    | Ext.Imp.     |
| 40  | 6.4L9       | 4.6 | 0.52 | 0.11 | 5    | Ext.Imp.     |
| 41  | 6.5L8       | 4.6 | 0.52 | 0.11 | 5    | Ext.Imp.     |
| 42  | 9.4L9       | 4.6 | 0.52 | 0.11 | 5    | Ext.Imp.     |
| 43  | 11.7L9      | 4.6 | 0.52 | 0.11 | 5    | Ext.Imp.     |
| 44  | 15.8L5      | 4.6 | 0.52 | 0.11 | 5    | Ext.Imp.     |
| 45  | 11.6L1      | 4.6 | 0.52 | 0.11 | 5    | Ext.Imp.     |
| 46  | 12.5L1      | 4.6 | 0.52 | 0.11 | 5    | Ext.Imp.     |
| 47  | 15.1L1      | 4.6 | 0.52 | 0.11 | 5    | Ext.Imp.     |
| 48  | 15.5L1      | 4.6 | 0.52 | 0.11 | 5    | Ext.Imp.     |
| 49  | 8.4L8       | 4.6 | 0.52 | 0.11 | 5    | Ext.Imp.     |
| 50  | 15.4L7      | 4.6 | 0.52 | 0.11 | 5    | Ext.Imp.     |
| 51  | 12.2L10     | 4.6 | 0.52 | 0.11 | 5    | Ext.Imp.     |
| 52  | 11.6L6      | 4.6 | 0.52 | 0.11 | 5    | Ext.Imp.     |
| 53  | 9.5L9       | 4.6 | 0.52 | 0.11 | 5    | Ext.Imp.     |
| 54  | 7.3L1       | 4.5 | 0.53 | 0.12 | 6    | Ext.Imp.     |
| 55  | 11.3L7      | 4.5 | 0.53 | 0.12 | 6    | Ext.Imp.     |
| 56  | 14.1L1      | 4.5 | 0.53 | 0.12 | 6    | Ext.Imp.     |
| 57  | 6.4L8       | 4.5 | 0.53 | 0.12 | 6    | Ext.Imp.     |
| 58  | 6.6L10      | 4.5 | 0.53 | 0.12 | 6    | Ext.Imp.     |
| 59  | 11.3L2      | 4.5 | 0.53 | 0.12 | 6    | Ext.Imp.     |
| 60  | 11.3L8      | 4.5 | 0.53 | 0.12 | 6    | Ext.Imp.     |
| 61  | 11.5L8      | 4.5 | 0.53 | 0.12 | 6    | Ext.Imp.     |
| 62  | 12.5L8      | 4.5 | 0.53 | 0.12 | 6    | Ext.Imp.     |
| 63  | 15.8L8      | 4.5 | 0.53 | 0.12 | 6    | Ext.Imp.     |
| 64  | 14.1L5      | 4.4 | 0.52 | 0.12 | 7    | V. Imp.      |
| 65  | 14.1L7      | 4.4 | 0.52 | 0.12 | 7    | V. Imp.      |
| 66  | 12.6L9      | 4.4 | 0.52 | 0.12 | 7    | V. Imp.      |
| 67  | 12.7L10     | 4.4 | 0.52 | 0.12 | 7    | V. Imp.      |
| 68  | 12.6L10     | 4.4 | 0.52 | 0.12 | 7    | V. Imp.      |
| 69  | 12.6L5      | 4.4 | 0.52 | 0.12 | 7    | V. Imp.      |
| 70  | 12.6L8      | 4.4 | 0.52 | 0.12 | 7    | V. Imp.      |
| 71  | 11.7L2      | 4.4 | 0.52 | 0.12 | 7    | V. Imp.      |
| 72  | 13.2L9      | 4.4 | 0.52 | 0.12 | 7    | V. Imp.      |
| 73  | 16.6L7      | 4.4 | 0.52 | 0.12 | 7    | V. Imp.      |
| 74  | 13.2L5      | 4.4 | 0.52 | 0.12 | 7    | V. Imp.      |
| 75  | 13.2L8      | 4.4 | 0.52 | 0.12 | 7    | V. Imp.      |
| 76  | 13.2L7      | 4.4 | 0.52 | 0.12 | 7    | V. Imp.      |
| 77  | 13.2L10     | 4.4 | 0.52 | 0.12 | 7    | V. Imp.      |
| 78  | 11.2L2      | 4.4 | 0.52 | 0.12 | 7    | V. Imp.      |
| 79  | 11.3L3      | 4.4 | 0.52 | 0.12 | 7    | V. Imp.      |
| 80  | 11.5L1      | 4.4 | 0.52 | 0.12 | 7    | V. Imp.      |
| 81  | 15.8L9      | 4.4 | 0.52 | 0.12 | 7    | V. Imp.      |
| 82  | 9.5L3       | 4.4 | 0.7  | 0.16 | 8    | V. Imp.      |
| 83  | 11.1L8      | 4.4 | 0.7  | 0.16 | 8    | V. Imp.      |
| 84  | 17.17L7     | 4.4 | 0.7  | 0.16 | 8    | V. Imp.      |
| 85  | 9.1L5       | 4.3 | 0.48 | 0.11 | 9    | V. Imp.      |
| 86  | 11.2L5      | 4.3 | 0.48 | 0.11 | 9    | V. Imp.      |
| 87  | 11.2L10     | 4.3 | 0.48 | 0.11 | 9    | V. Imp.      |
| 88  | 11.3L1      | 4.3 | 0.48 | 0.11 | 9    | V. Imp.      |
| 89  | 12.2L2      | 4.3 | 0.48 | 0.11 | 9    | V. Imp.      |
| 90  | 12.5L7      | 4.3 | 0.48 | 0.11 | 9    | V. Imp.      |
| 91  | 12.8L2      | 4.3 | 0.48 | 0.11 | 9    | V. Imp.      |
| 92  | 13.2L1      | 4.3 | 0.48 | 0.11 | 9    | V. Imp.      |
| 93  | 15.8L7      | 4.3 | 0.48 | 0.11 | 9    | V. Imp.      |
| 94  | 1.2L2       | 4.2 | 0.42 | 0.1  | 10   | V. Imp.      |
| 95  | 7.1L8       | 4.2 | 0.42 | 0.1  | 10   | V. Imp.      |
| 96  | 8.2L5       | 4.2 | 0.42 | 0.1  | 10   | V. Imp.      |
| 97  | 11.1L1      | 4.2 | 0.42 | 0.1  | 10   | V. Imp.      |
| 98  | 11.1L3      | 4.2 | 0.42 | 0.1  | 10   | V. Imp.      |
| 99  | 11.2L3      | 4.2 | 0.42 | 0.1  | 10   | V. Imp.      |
| 100 | 11.2L8      | 4.2 | 0.42 | 0.1  | 10   | V. Imp.      |
| 101 | 11.2L9      | 4.2 | 0.42 | 0.1  | 10   | V. Imp.      |
| 102 | 11.3L5      | 4.2 | 0.42 | 0.1  | 10   | V. Imp.      |
| 103 | 11.5L10     | 4.2 | 0.42 | 0.1  | 10   | V. Imp.      |
| 104 | 11.6L3      | 4.2 | 0.42 | 0.1  | 10   | V. Imp.      |

|     |         |     |      |      |    |         |
|-----|---------|-----|------|------|----|---------|
| 105 | 11.6L10 | 4.2 | 0.42 | 0.1  | 10 | V. Imp. |
| 106 | 11.7L7  | 4.2 | 0.42 | 0.1  | 10 | V. Imp. |
| 107 | 11.7L10 | 4.2 | 0.42 | 0.1  | 10 | V. Imp. |
| 108 | 12.1L1  | 4.2 | 0.42 | 0.1  | 10 | V. Imp. |
| 109 | 12.1L7  | 4.2 | 0.42 | 0.1  | 10 | V. Imp. |
| 110 | 12.4L5  | 4.2 | 0.42 | 0.1  | 10 | V. Imp. |
| 111 | 12.4L7  | 4.2 | 0.42 | 0.1  | 10 | V. Imp. |
| 112 | 12.6L2  | 4.2 | 0.42 | 0.1  | 10 | V. Imp. |
| 113 | 12.6L7  | 4.2 | 0.42 | 0.1  | 10 | V. Imp. |
| 114 | 16.5L8  | 4.2 | 0.79 | 0.19 | 11 | V. Imp. |
| 115 | 1.2L8   | 4.1 | 0.32 | 0.08 | 12 | V. Imp. |
| 116 | 5.5L3   | 4.1 | 0.32 | 0.08 | 12 | V. Imp. |
| 117 | 5.5L7   | 4.1 | 0.32 | 0.08 | 12 | V. Imp. |
| 118 | 6.1L2   | 4.1 | 0.32 | 0.08 | 12 | V. Imp. |
| 119 | 6.1L8   | 4.1 | 0.32 | 0.08 | 12 | V. Imp. |
| 120 | 6.1L9   | 4.1 | 0.32 | 0.08 | 12 | V. Imp. |
| 121 | 6.2L3   | 4.1 | 0.32 | 0.08 | 12 | V. Imp. |
| 122 | 6.2L4   | 4.1 | 0.32 | 0.08 | 12 | V. Imp. |
| 123 | 6.2L5   | 4.1 | 0.32 | 0.08 | 12 | V. Imp. |
| 124 | 6.2L7   | 4.1 | 0.32 | 0.08 | 12 | V. Imp. |
| 125 | 6.2L10  | 4.1 | 0.32 | 0.08 | 12 | V. Imp. |
| 126 | 6.3L2   | 4.1 | 0.32 | 0.08 | 12 | V. Imp. |
| 127 | 6.3L7   | 4.1 | 0.32 | 0.08 | 12 | V. Imp. |
| 128 | 6.3L8   | 4.1 | 0.32 | 0.08 | 12 | V. Imp. |
| 129 | 6.4L10  | 4.1 | 0.32 | 0.08 | 12 | V. Imp. |
| 130 | 6.5L3   | 4.1 | 0.32 | 0.08 | 12 | V. Imp. |
| 131 | 6.5L5   | 4.1 | 0.32 | 0.08 | 12 | V. Imp. |
| 132 | 6.5L7   | 4.1 | 0.32 | 0.08 | 12 | V. Imp. |
| 133 | 6.5L9   | 4.1 | 0.32 | 0.08 | 12 | V. Imp. |
| 134 | 6.6L7   | 4.1 | 0.32 | 0.08 | 12 | V. Imp. |
| 135 | 6.6L8   | 4.1 | 0.32 | 0.08 | 12 | V. Imp. |
| 136 | 6.6L9   | 4.1 | 0.32 | 0.08 | 12 | V. Imp. |
| 137 | 7.1L9   | 4.1 | 0.32 | 0.08 | 12 | V. Imp. |
| 138 | 7.1L10  | 4.1 | 0.32 | 0.08 | 12 | V. Imp. |
| 139 | 7.2L1   | 4.1 | 0.32 | 0.08 | 12 | V. Imp. |
| 140 | 7.2L5   | 4.1 | 0.32 | 0.08 | 12 | V. Imp. |
| 141 | 7.2L7   | 4.1 | 0.32 | 0.08 | 12 | V. Imp. |
| 142 | 7.2L8   | 4.1 | 0.32 | 0.08 | 12 | V. Imp. |
| 143 | 7.2L10  | 4.1 | 0.32 | 0.08 | 12 | V. Imp. |
| 144 | 8.1L1   | 4.1 | 0.32 | 0.08 | 12 | V. Imp. |
| 145 | 8.1L5   | 4.1 | 0.32 | 0.08 | 12 | V. Imp. |
| 146 | 8.1L8   | 4.1 | 0.32 | 0.08 | 12 | V. Imp. |
| 147 | 8.1L9   | 4.1 | 0.32 | 0.08 | 12 | V. Imp. |
| 148 | 8.1L10  | 4.1 | 0.32 | 0.08 | 12 | V. Imp. |
| 149 | 8.2L3   | 4.1 | 0.32 | 0.08 | 12 | V. Imp. |
| 150 | 8.2L6   | 4.1 | 0.32 | 0.08 | 12 | V. Imp. |
| 151 | 8.2L7   | 4.1 | 0.32 | 0.08 | 12 | V. Imp. |
| 152 | 8.4L1   | 4.1 | 0.32 | 0.08 | 12 | V. Imp. |
| 153 | 8.4L7   | 4.1 | 0.32 | 0.08 | 12 | V. Imp. |
| 154 | 8.4L9   | 4.1 | 0.32 | 0.08 | 12 | V. Imp. |
| 155 | 8.4L10  | 4.1 | 0.32 | 0.08 | 12 | V. Imp. |
| 156 | 8.8L7   | 4.1 | 0.32 | 0.08 | 12 | V. Imp. |
| 157 | 8.8L9   | 4.1 | 0.32 | 0.08 | 12 | V. Imp. |
| 158 | 9.1L1   | 4.1 | 0.32 | 0.08 | 12 | V. Imp. |
| 159 | 9.2L1   | 4.1 | 0.32 | 0.08 | 12 | V. Imp. |
| 160 | 9.2L9   | 4.1 | 0.32 | 0.08 | 12 | V. Imp. |
| 161 | 9.2L10  | 4.1 | 0.32 | 0.08 | 12 | V. Imp. |
| 162 | 9.4L3   | 4.1 | 0.32 | 0.08 | 12 | V. Imp. |
| 163 | 9.4L5   | 4.1 | 0.32 | 0.08 | 12 | V. Imp. |
| 164 | 9.4L7   | 4.1 | 0.32 | 0.08 | 12 | V. Imp. |
| 165 | 9.4L10  | 4.1 | 0.32 | 0.08 | 12 | V. Imp. |
| 166 | 9.5L1   | 4.1 | 0.32 | 0.08 | 12 | V. Imp. |
| 167 | 9.5L7   | 4.1 | 0.32 | 0.08 | 12 | V. Imp. |
| 168 | 10.2L1  | 4.1 | 0.32 | 0.08 | 12 | V. Imp. |
| 169 | 10.2L3  | 4.1 | 0.32 | 0.08 | 12 | V. Imp. |
| 170 | 10.2L5  | 4.1 | 0.32 | 0.08 | 12 | V. Imp. |
| 171 | 10.2L7  | 4.1 | 0.32 | 0.08 | 12 | V. Imp. |
| 172 | 10.2L9  | 4.1 | 0.32 | 0.08 | 12 | V. Imp. |
| 173 | 10.2L10 | 4.1 | 0.32 | 0.08 | 12 | V. Imp. |
| 174 | 11.1L5  | 4.1 | 0.32 | 0.08 | 12 | V. Imp. |
| 175 | 11.1L9  | 4.1 | 0.32 | 0.08 | 12 | V. Imp. |
| 176 | 11.1L10 | 4.1 | 0.32 | 0.08 | 12 | V. Imp. |
| 177 | 11.2L1  | 4.1 | 0.32 | 0.08 | 12 | V. Imp. |
| 178 | 11.3L10 | 4.1 | 0.32 | 0.08 | 12 | V. Imp. |
| 179 | 11.5L3  | 4.1 | 0.32 | 0.08 | 12 | V. Imp. |
| 180 | 11.5L9  | 4.1 | 0.32 | 0.08 | 12 | V. Imp. |
| 181 | 11.6L7  | 4.1 | 0.32 | 0.08 | 12 | V. Imp. |
| 182 | 11.7L1  | 4.1 | 0.32 | 0.08 | 12 | V. Imp. |
| 183 | 12.1L2  | 4.1 | 0.32 | 0.08 | 12 | V. Imp. |
| 184 | 12.4L9  | 4.1 | 0.32 | 0.08 | 12 | V. Imp. |
| 185 | 12.7L1  | 4.1 | 0.32 | 0.08 | 12 | V. Imp. |
| 186 | 12.8L10 | 4.1 | 0.32 | 0.08 | 12 | V. Imp. |
| 187 | 14.1L8  | 4.1 | 0.32 | 0.08 | 12 | V. Imp. |
| 188 | 14.1L9  | 4.1 | 0.32 | 0.08 | 12 | V. Imp. |
| 189 | 16.5L3  | 4.1 | 0.32 | 0.08 | 12 | V. Imp. |
| 190 | 17.1L5  | 4.1 | 0.32 | 0.08 | 12 | V. Imp. |
| 191 | 17.5L4  | 4.1 | 0.32 | 0.08 | 12 | V. Imp. |
| 192 | 17.5L5  | 4.1 | 0.32 | 0.08 | 12 | V. Imp. |
| 193 | 17.5L10 | 4.1 | 0.32 | 0.08 | 12 | V. Imp. |
| 194 | 17.7L9  | 4.1 | 0.32 | 0.08 | 12 | V. Imp. |
| 195 | 17.7L10 | 4.1 | 0.32 | 0.08 | 12 | V. Imp. |
| 196 | 17.9L1  | 4.1 | 0.32 | 0.08 | 12 | V. Imp. |
| 197 | 17.9L3  | 4.1 | 0.32 | 0.08 | 12 | V. Imp. |
| 198 | 17.14L1 | 4.1 | 0.32 | 0.08 | 12 | V. Imp. |
| 199 | 17.14L5 | 4.1 | 0.32 | 0.08 | 12 | V. Imp. |
| 200 | 17.14L7 | 4.1 | 0.32 | 0.08 | 12 | V. Imp. |
| 201 | 17.14L8 | 4.1 | 0.32 | 0.08 | 12 | V. Imp. |
| 202 | 17.16L7 | 4.1 | 0.32 | 0.08 | 12 | V. Imp. |
| 203 | 17.16L9 | 4.1 | 0.32 | 0.08 | 12 | V. Imp. |
| 204 | 17.17L9 | 4.1 | 0.32 | 0.08 | 12 | V. Imp. |
| 205 | 17.19L5 | 4.1 | 0.32 | 0.08 | 12 | V. Imp. |
| 206 | 7.1L5   | 4.1 | 0.57 | 0.14 | 13 | V. Imp. |
| 207 | 7.3L7   | 4.1 | 0.57 | 0.14 | 13 | V. Imp. |
| 208 | 9.5L4   | 4.1 | 0.57 | 0.14 | 13 | V. Imp. |
| 209 | 9.5L11  | 4.1 | 0.57 | 0.14 | 13 | V. Imp. |
| 210 | 12.5L5  | 4.1 | 0.57 | 0.14 | 13 | V. Imp. |
| 211 | 15.4L9  | 4.1 | 0.57 | 0.14 | 13 | V. Imp. |
| 212 | 1.2L9   | 4   | 0    | 0    | 14 | V. Imp. |
| 213 | 6.2L9   | 4   | 0    | 0    | 14 | V. Imp. |

|     |          |     |      |      |    |         |
|-----|----------|-----|------|------|----|---------|
| 214 | 6.4L2    | 4   | 0    | 0    | 14 | V. Imp. |
| 215 | 6.4L7    | 4   | 0    | 0    | 14 | V. Imp. |
| 216 | 6.5L1    | 4   | 0    | 0    | 14 | V. Imp. |
| 217 | 6.5L10   | 4   | 0    | 0    | 14 | V. Imp. |
| 218 | 6.6L1    | 4   | 0    | 0    | 14 | V. Imp. |
| 219 | 7.1L1    | 4   | 0    | 0    | 14 | V. Imp. |
| 220 | 7.2L9    | 4   | 0    | 0    | 14 | V. Imp. |
| 221 | 7.3L5    | 4   | 0    | 0    | 14 | V. Imp. |
| 222 | 8.1L7    | 4   | 0    | 0    | 14 | V. Imp. |
| 223 | 8.2L2    | 4   | 0    | 0    | 14 | V. Imp. |
| 224 | 9.1L7    | 4   | 0    | 0    | 14 | V. Imp. |
| 225 | 9.1L8    | 4   | 0    | 0    | 14 | V. Imp. |
| 226 | 9.1L9    | 4   | 0    | 0    | 14 | V. Imp. |
| 227 | 9.1L10   | 4   | 0    | 0    | 14 | V. Imp. |
| 228 | 9.5L5    | 4   | 0    | 0    | 14 | V. Imp. |
| 229 | 9.5L8    | 4   | 0    | 0    | 14 | V. Imp. |
| 230 | 9.5L10   | 4   | 0    | 0    | 14 | V. Imp. |
| 231 | 11.2L7   | 4   | 0    | 0    | 14 | V. Imp. |
| 232 | 12.1L10  | 4   | 0    | 0    | 14 | V. Imp. |
| 233 | 12.6L1   | 4   | 0    | 0    | 14 | V. Imp. |
| 234 | 15.1L9   | 4   | 0    | 0    | 14 | V. Imp. |
| 235 | 16.5L10  | 4   | 0    | 0    | 14 | V. Imp. |
| 236 | 17.1L8   | 4   | 0    | 0    | 14 | V. Imp. |
| 237 | 17.5L7   | 4   | 0    | 0    | 14 | V. Imp. |
| 238 | 17.7L1   | 4   | 0    | 0    | 14 | V. Imp. |
| 239 | 17.7L3   | 4   | 0    | 0    | 14 | V. Imp. |
| 240 | 17.7L5   | 4   | 0    | 0    | 14 | V. Imp. |
| 241 | 17.7L7   | 4   | 0    | 0    | 14 | V. Imp. |
| 242 | 17.14L9  | 4   | 0    | 0    | 14 | V. Imp. |
| 243 | 17.17L8  | 4   | 0    | 0    | 14 | V. Imp. |
| 244 | 17.17L10 | 4   | 0    | 0    | 14 | V. Imp. |
| 245 | 1.1L9    | 4   | 0.47 | 0.12 | 15 | V. Imp. |
| 246 | 6.3L1    | 4   | 0.47 | 0.12 | 15 | V. Imp. |
| 247 | 6.3L5    | 4   | 0.47 | 0.12 | 15 | V. Imp. |
| 248 | 6.3L9    | 4   | 0.47 | 0.12 | 15 | V. Imp. |
| 249 | 6.3L10   | 4   | 0.47 | 0.12 | 15 | V. Imp. |
| 250 | 6.4L1    | 4   | 0.47 | 0.12 | 15 | V. Imp. |
| 251 | 6.4L5    | 4   | 0.47 | 0.12 | 15 | V. Imp. |
| 252 | 8.8L10   | 4   | 0.47 | 0.12 | 15 | V. Imp. |
| 253 | 11.1L7   | 4   | 0.47 | 0.12 | 15 | V. Imp. |
| 254 | 12.5L3   | 4   | 0.47 | 0.12 | 15 | V. Imp. |
| 255 | 13.3L9   | 4   | 0.47 | 0.12 | 15 | V. Imp. |
| 256 | 17.9L9   | 4   | 0.47 | 0.12 | 15 | V. Imp. |
| 257 | 17.9L10  | 4   | 0.47 | 0.12 | 15 | V. Imp. |
| 258 | 7.3L8    | 4   | 0.67 | 0.17 | 16 | V. Imp. |
| 259 | 8.5L9    | 4   | 0.67 | 0.17 | 16 | V. Imp. |
| 260 | 1.1L2    | 4   | 0.82 | 0.21 | 17 | V. Imp. |
| 261 | 12.5L6   | 4   | 0.94 | 0.24 | 18 | V. Imp. |
| 262 | 8.4L5    | 3.9 | 0.32 | 0.08 | 19 | V. Imp. |
| 263 | 8.7L7    | 3.9 | 0.32 | 0.08 | 19 | V. Imp. |
| 264 | 9.4L1    | 3.9 | 0.32 | 0.08 | 19 | V. Imp. |
| 265 | 11.5L5   | 3.9 | 0.32 | 0.08 | 19 | V. Imp. |
| 266 | 13.3L5   | 3.9 | 0.32 | 0.08 | 19 | V. Imp. |
| 267 | 15.8L1   | 3.9 | 0.32 | 0.08 | 19 | V. Imp. |
| 268 | 16.6L3   | 3.9 | 0.32 | 0.08 | 19 | V. Imp. |
| 269 | 16.6L10  | 3.9 | 0.32 | 0.08 | 19 | V. Imp. |
| 270 | 17.1L9   | 3.9 | 0.32 | 0.08 | 19 | V. Imp. |
| 271 | 17.1L10  | 3.9 | 0.32 | 0.08 | 19 | V. Imp. |
| 272 | 17.5L3   | 3.9 | 0.32 | 0.08 | 19 | V. Imp. |
| 273 | 17.5L8   | 3.9 | 0.32 | 0.08 | 19 | V. Imp. |
| 274 | 17.5L9   | 3.9 | 0.32 | 0.08 | 19 | V. Imp. |
| 275 | 17.7L8   | 3.9 | 0.32 | 0.08 | 19 | V. Imp. |
| 276 | 17.9L5   | 3.9 | 0.32 | 0.08 | 19 | V. Imp. |
| 277 | 17.14L3  | 3.9 | 0.32 | 0.08 | 19 | V. Imp. |
| 278 | 17.14L10 | 3.9 | 0.32 | 0.08 | 19 | V. Imp. |
| 279 | 17.17L1  | 3.9 | 0.32 | 0.08 | 19 | V. Imp. |
| 280 | 17.19L1  | 3.9 | 0.32 | 0.08 | 19 | V. Imp. |
| 281 | 17.19L7  | 3.9 | 0.32 | 0.08 | 19 | V. Imp. |
| 282 | 9.4L8    | 3.9 | 0.57 | 0.15 | 20 | V. Imp. |
| 283 | 9.5L6    | 3.9 | 0.57 | 0.15 | 20 | V. Imp. |
| 284 | 15.5L9   | 3.9 | 0.57 | 0.15 | 20 | V. Imp. |
| 285 | 7.3L10   | 3.9 | 0.74 | 0.19 | 21 | V. Imp. |
| 286 | 11.7L5   | 3.9 | 0.74 | 0.19 | 21 | V. Imp. |
| 287 | 15.4L8   | 3.9 | 0.74 | 0.19 | 21 | V. Imp. |
| 288 | 15.5L8   | 3.9 | 0.88 | 0.23 | 22 | V. Imp. |
| 289 | 6.5L2    | 3.9 | 0.99 | 0.25 | 23 | V. Imp. |
| 290 | 9.5L2    | 3.9 | 0.99 | 0.25 | 23 | V. Imp. |
| 291 | 12.8L1   | 3.9 | 0.99 | 0.25 | 23 | V. Imp. |
| 292 | 13.3L7   | 3.8 | 0.42 | 0.11 | 24 | V. Imp. |
| 293 | 15.1L3   | 3.8 | 0.63 | 0.17 | 25 | V. Imp. |
| 294 | 16.6L8   | 3.8 | 0.63 | 0.17 | 25 | V. Imp. |
| 295 | 17.9L8   | 3.8 | 0.63 | 0.17 | 25 | V. Imp. |
| 296 | 17.16L2  | 3.8 | 0.63 | 0.17 | 25 | V. Imp. |
| 297 | 17.19L10 | 3.8 | 0.63 | 0.17 | 25 | V. Imp. |
| 298 | 10.3L7   | 3.8 | 0.79 | 0.21 | 26 | V. Imp. |
| 299 | 12.4L1   | 3.8 | 0.79 | 0.21 | 26 | V. Imp. |
| 300 | 9.3L1    | 3.8 | 0.92 | 0.24 | 27 | V. Imp. |
| 301 | 12.2L4   | 3.7 | 0.48 | 0.13 | 28 | V. Imp. |
| 302 | 13.3L8   | 3.7 | 0.67 | 0.18 | 29 | V. Imp. |
| 303 | 12.7L2   | 3.7 | 0.82 | 0.22 | 30 | V. Imp. |
| 304 | 8.6L9    | 3.7 | 0.95 | 0.26 | 31 | V. Imp. |
| 305 | 9.1L2    | 3.7 | 0.95 | 0.26 | 31 | V. Imp. |
| 306 | 15.5L7   | 3.7 | 0.95 | 0.26 | 31 | V. Imp. |
| 307 | 17.1L2   | 3.7 | 0.95 | 0.26 | 31 | V. Imp. |
| 308 | 6.4L4    | 3.6 | 0.84 | 0.23 | 32 | V. Imp. |
| 309 | 12.2L3   | 3.6 | 0.84 | 0.23 | 32 | V. Imp. |
| 310 | 17.9L7   | 3.6 | 0.84 | 0.23 | 32 | V. Imp. |
| 311 | 1.2L10   | 3.6 | 0.97 | 0.27 | 33 | V. Imp. |
| 312 | 6.4L3    | 3.6 | 0.97 | 0.27 | 33 | V. Imp. |
| 313 | 6.6L2    | 3.6 | 0.97 | 0.27 | 33 | V. Imp. |
| 314 | 6.2L1    | 3.6 | 0.97 | 0.27 | 33 | V. Imp. |
| 315 | 6.6L12   | 3.5 | 0.53 | 0.15 | 34 | Imp.    |
| 316 | 7.3L11   | 3.5 | 0.85 | 0.24 | 35 | Imp.    |
| 317 | 8.1L2    | 3.5 | 0.85 | 0.24 | 35 | Imp.    |
| 318 | 8.5L1    | 3.5 | 0.85 | 0.24 | 35 | Imp.    |
| 319 | 11.6L11  | 3.5 | 0.85 | 0.24 | 35 | Imp.    |
| 320 | 3.9L9    | 3.5 | 0.97 | 0.28 | 36 | Imp.    |
| 321 | 7.1L2    | 3.5 | 0.97 | 0.28 | 36 | Imp.    |
| 322 | 8.7L9    | 3.5 | 0.97 | 0.28 | 36 | Imp.    |



|     |          |     |      |      |    |           |
|-----|----------|-----|------|------|----|-----------|
| 323 | 12.5L2   | 3.5 | 0.97 | 0.28 | 36 | Imp.      |
| 324 | 8.8L1    | 3.4 | 0.52 | 0.15 | 37 | Imp.      |
| 325 | 10.3L2   | 3.4 | 0.7  | 0.21 | 38 | Imp.      |
| 326 | 16.3L3   | 3.4 | 0.7  | 0.21 | 38 | Imp.      |
| 327 | 8.4L11   | 3.4 | 0.97 | 0.29 | 39 | Imp.      |
| 328 | 9.1L6    | 3.4 | 0.97 | 0.29 | 39 | Imp.      |
| 329 | 12.4L3   | 3.4 | 0.97 | 0.29 | 39 | Imp.      |
| 330 | 13.2L4   | 3.4 | 0.97 | 0.29 | 39 | Imp.      |
| 331 | 5.1L9    | 3.3 | 0.82 | 0.25 | 40 | Imp.      |
| 332 | 9.2L3    | 3.3 | 0.82 | 0.25 | 40 | Imp.      |
| 333 | 1.4L9    | 3.3 | 0.95 | 0.29 | 41 | Imp.      |
| 334 | 5.1L8    | 3.3 | 0.95 | 0.29 | 41 | Imp.      |
| 335 | 9.2L2    | 3.3 | 0.95 | 0.29 | 41 | Imp.      |
| 336 | 9.4L4    | 3.3 | 0.95 | 0.29 | 41 | Imp.      |
| 337 | 17.9L2   | 3.3 | 0.95 | 0.29 | 41 | Imp.      |
| 338 | 17.14L2  | 3.3 | 0.95 | 0.29 | 41 | Imp.      |
| 339 | 12.5L11  | 3.2 | 0.79 | 0.25 | 42 | Imp.      |
| 340 | 17.19L11 | 3.2 | 0.79 | 0.25 | 42 | Imp.      |
| 341 | 8.4L3    | 3.2 | 0.92 | 0.29 | 43 | Imp.      |
| 342 | 10.3L3   | 3.2 | 0.92 | 0.29 | 43 | Imp.      |
| 343 | 12.5L4   | 3.2 | 0.92 | 0.29 | 43 | Imp.      |
| 344 | 15.4L3   | 3.2 | 0.92 | 0.29 | 43 | Imp.      |
| 345 | 16.5L1   | 3.2 | 0.92 | 0.29 | 43 | Imp.      |
| 346 | 6.1L1    | 3.1 | 0.32 | 0.1  | 44 | Imp.      |
| 347 | 11.6L4   | 3.1 | 0.32 | 0.1  | 44 | Imp.      |
| 348 | 6.6L5    | 3.1 | 0.74 | 0.24 | 45 | Imp.      |
| 349 | 9.2L6    | 3.1 | 0.74 | 0.24 | 45 | Imp.      |
| 350 | 17.5L1   | 3.1 | 0.74 | 0.24 | 45 | Imp.      |
| 351 | 17.19L2  | 3.1 | 0.74 | 0.24 | 45 | Imp.      |
| 352 | 3.9L5    | 3.1 | 0.88 | 0.28 | 46 | Imp.      |
| 353 | 3.9L7    | 3.1 | 0.88 | 0.28 | 46 | Imp.      |
| 354 | 6.4L6    | 3.1 | 0.88 | 0.28 | 46 | Imp.      |
| 355 | 8.8L4    | 3.1 | 0.88 | 0.28 | 46 | Imp.      |
| 356 | 9.2L4    | 3.1 | 0.88 | 0.28 | 46 | Imp.      |
| 357 | 9.3L10   | 3.1 | 0.88 | 0.28 | 46 | Imp.      |
| 358 | 17.17L2  | 3.1 | 0.88 | 0.28 | 46 | Imp.      |
| 359 | 6.6L3    | 3.1 | 0.99 | 0.32 | 47 | Imp.      |
| 360 | 7.2L11   | 3.1 | 0.99 | 0.32 | 47 | Imp.      |
| 361 | 8.6L1    | 3.1 | 0.99 | 0.32 | 47 | Imp.      |
| 362 | 15.5L5   | 3.1 | 0.99 | 0.32 | 47 | Imp.      |
| 363 | 3.4L7    | 3   | 0    | 0    | 48 | Imp.      |
| 364 | 6.2L6    | 3   | 0    | 0    | 48 | Imp.      |
| 365 | 8.4L6    | 3   | 0.82 | 0.27 | 49 | Imp.      |
| 366 | 8.6L2    | 3   | 0.82 | 0.27 | 49 | Imp.      |
| 367 | 12.1L11  | 3   | 0.82 | 0.27 | 49 | Imp.      |
| 368 | 12.4L6   | 3   | 0.82 | 0.27 | 49 | Imp.      |
| 369 | 15.1L6   | 3   | 0.82 | 0.27 | 49 | Imp.      |
| 370 | 9.2L8    | 3   | 0.94 | 0.31 | 50 | Imp.      |
| 371 | 12.7L11  | 3   | 0.94 | 0.31 | 50 | Imp.      |
| 372 | 12.4L4   | 2.9 | 0.57 | 0.2  | 51 | Imp.      |
| 373 | 11.5L2   | 2.9 | 0.74 | 0.26 | 52 | Imp.      |
| 374 | 16.5L2   | 2.9 | 0.74 | 0.26 | 52 | Imp.      |
| 375 | 8.1L11   | 2.9 | 0.88 | 0.3  | 53 | Imp.      |
| 376 | 11.6L2   | 2.9 | 0.88 | 0.3  | 53 | Imp.      |
| 377 | 17.5L2   | 2.9 | 0.88 | 0.3  | 53 | Imp.      |
| 378 | 12.2L6   | 2.9 | 0.99 | 0.34 | 54 | Imp.      |
| 379 | 12.6L11  | 2.9 | 0.99 | 0.34 | 54 | Imp.      |
| 380 | 6.3L4    | 2.8 | 0.63 | 0.23 | 55 | Imp.      |
| 381 | 1.1L4    | 2.8 | 0.92 | 0.33 | 56 | Imp.      |
| 382 | 1.2L3    | 2.8 | 0.92 | 0.33 | 56 | Imp.      |
| 383 | 5.5L1    | 2.7 | 0.48 | 0.18 | 57 | Imp.      |
| 384 | 8.6L11   | 2.7 | 0.48 | 0.18 | 57 | Imp.      |
| 385 | 8.6L10   | 2.7 | 0.82 | 0.3  | 58 | Imp.      |
| 386 | 9.2L5    | 2.7 | 0.95 | 0.35 | 59 | Imp.      |
| 387 | 12.4L2   | 2.7 | 0.95 | 0.35 | 59 | Imp.      |
| 388 | 12.4L11  | 2.7 | 0.95 | 0.35 | 59 | Imp.      |
| 389 | 6.2L11   | 2.6 | 0.52 | 0.2  | 60 | Imp.      |
| 390 | 15.5L3   | 2.6 | 0.52 | 0.2  | 60 | Imp.      |
| 391 | 17.1L4   | 2.6 | 0.7  | 0.27 | 61 | Imp.      |
| 392 | 12.2L11  | 2.6 | 0.84 | 0.32 | 62 | Imp.      |
| 393 | 17.7L2   | 2.6 | 0.84 | 0.32 | 62 | Imp.      |
| 394 | 10.2L8   | 2.6 | 0.97 | 0.37 | 63 | Imp.      |
| 395 | 17.5L11  | 2.6 | 0.97 | 0.37 | 63 | Imp.      |
| 396 | 12.8L11  | 2.5 | 0.71 | 0.28 | 64 | Som. Imp. |
| 397 | 5.1L5    | 2.5 | 0.85 | 0.34 | 65 | Som. Imp. |
| 398 | 5.1L7    | 2.5 | 0.97 | 0.39 | 66 | Som. Imp. |
| 399 | 5.5L5    | 2.4 | 0.52 | 0.22 | 67 | Som. Imp. |
| 400 | 5.5L10   | 2.4 | 0.52 | 0.22 | 67 | Som. Imp. |
| 401 | 5.5L9    | 2.3 | 0.48 | 0.21 | 68 | Som. Imp. |
| 402 | 5.5L11   | 2.3 | 0.48 | 0.21 | 68 | Som. Imp. |
| 403 | 12.7L4   | 2.3 | 0.67 | 0.29 | 69 | Som. Imp. |
| 404 | 1.4L8    | 2.3 | 0.82 | 0.36 | 70 | Som. Imp. |
| 405 | 10.2L2   | 2.3 | 0.95 | 0.41 | 71 | Som. Imp. |
| 406 | 9.3L4    | 2.2 | 0.42 | 0.19 | 72 | Som. Imp. |
| 407 | 8.5L2    | 2.2 | 0.63 | 0.29 | 73 | Som. Imp. |
| 408 | 5.1L1    | 2.2 | 0.92 | 0.42 | 74 | Som. Imp. |
| 409 | 5.1L3    | 2.2 | 0.92 | 0.42 | 74 | Som. Imp. |
| 410 | 2.4L5    | 2   | 0    | 0    | 75 | Som. Imp. |
| 411 | 3.4L1    | 2   | 0    | 0    | 75 | Som. Imp. |
| 412 | 9.2L11   | 2   | 0.94 | 0.47 | 76 | Som. Imp. |
| 413 | 2.3L1    | 1.9 | 0.32 | 0.17 | 77 | Som. Imp. |
| 414 | 1.4L1    | 1.8 | 0.63 | 0.35 | 78 | Som. Imp. |
| 415 | 12.3L9   | 1.8 | 0.79 | 0.44 | 79 | Som. Imp. |
| 416 | 8.8L2    | 1.4 | 0.52 | 0.37 | 80 | Not Imp.  |
| 417 | 5.6L1    | 1.4 | 0.52 | 0.37 | 80 | Not Imp.  |
| 418 | 8.5L3    | 1.4 | 0.52 | 0.37 | 80 | Not Imp.  |
| 419 | 12.3L2   | 1.4 | 0.52 | 0.37 | 80 | Not Imp.  |
| 420 | 5.2L9    | 1.3 | 0.48 | 0.37 | 81 | Not Imp.  |
| 421 | 2.3L4    | 1.3 | 0.48 | 0.37 | 81 | Not Imp.  |
| 422 | 2.4L6    | 1.3 | 0.48 | 0.37 | 81 | Not Imp.  |
| 423 | 2.5L6    | 1.3 | 0.48 | 0.37 | 81 | Not Imp.  |
| 424 | 3.9L11   | 1.3 | 0.48 | 0.37 | 81 | Not Imp.  |
| 425 | 4.7L2    | 1.3 | 0.48 | 0.37 | 81 | Not Imp.  |
| 426 | 4.7L7    | 1.3 | 0.48 | 0.37 | 81 | Not Imp.  |
| 427 | 5.3L9    | 1.3 | 0.48 | 0.37 | 81 | Not Imp.  |
| 428 | 5.4L9    | 1.3 | 0.48 | 0.37 | 81 | Not Imp.  |
| 429 | 5.6L3    | 1.3 | 0.48 | 0.37 | 81 | Not Imp.  |
| 430 | 8.7L2    | 1.3 | 0.48 | 0.37 | 81 | Not Imp.  |
| 431 | 1.4L2    | 1.2 | 0.42 | 0.35 | 82 | Not Imp.  |

|     |         |     |      |      |    |          |
|-----|---------|-----|------|------|----|----------|
| 432 | 2.1L6   | 1.2 | 0.42 | 0.35 | 82 | Not Imp. |
| 433 | 2.1L7   | 1.2 | 0.42 | 0.35 | 82 | Not Imp. |
| 434 | 2.3L7   | 1.2 | 0.42 | 0.35 | 82 | Not Imp. |
| 435 | 2.5L4   | 1.2 | 0.42 | 0.35 | 82 | Not Imp. |
| 436 | 3.4L11  | 1.2 | 0.42 | 0.35 | 82 | Not Imp. |
| 437 | 5.6L9   | 1.2 | 0.42 | 0.35 | 82 | Not Imp. |
| 438 | 2.3L5   | 1.2 | 0.42 | 0.35 | 82 | Not Imp. |
| 439 | 2.5L5   | 1.2 | 0.42 | 0.35 | 82 | Not Imp. |
| 440 | 5.2L3   | 1.2 | 0.42 | 0.35 | 82 | Not Imp. |
| 441 | 5.3L4   | 1.2 | 0.42 | 0.35 | 82 | Not Imp. |
| 442 | 12.3L10 | 1.2 | 0.42 | 0.35 | 82 | Not Imp. |
| 443 | 2.1L5   | 1.1 | 0.32 | 0.29 | 83 | Not Imp. |
| 444 | 2.3L6   | 1.1 | 0.32 | 0.29 | 83 | Not Imp. |
| 445 | 2.4L7   | 1.1 | 0.32 | 0.29 | 83 | Not Imp. |
| 446 | 2.5L7   | 1.1 | 0.32 | 0.29 | 83 | Not Imp. |
| 447 | 5.4L3   | 1.1 | 0.32 | 0.29 | 83 | Not Imp. |
| 448 | 1.3L3   | 1.1 | 0.32 | 0.29 | 83 | Not Imp. |
| 449 | 1.4L3   | 1.1 | 0.32 | 0.29 | 83 | Not Imp. |
| 450 | 2.1L4   | 1.1 | 0.32 | 0.29 | 83 | Not Imp. |
| 451 | 2.4L4   | 1.1 | 0.32 | 0.29 | 83 | Not Imp. |
| 452 | 2.5L2   | 1.1 | 0.32 | 0.29 | 83 | Not Imp. |
| 453 | 3.4L2   | 1.1 | 0.32 | 0.29 | 83 | Not Imp. |
| 454 | 4.5L3   | 1.1 | 0.32 | 0.29 | 83 | Not Imp. |
| 455 | 4.7L3   | 1.1 | 0.32 | 0.29 | 83 | Not Imp. |
| 456 | 4.7L9   | 1.1 | 0.32 | 0.29 | 83 | Not Imp. |
| 457 | 5.2L1   | 1.1 | 0.32 | 0.29 | 83 | Not Imp. |
| 458 | 5.3L1   | 1.1 | 0.32 | 0.29 | 83 | Not Imp. |
| 459 | 5.4L1   | 1.1 | 0.32 | 0.29 | 83 | Not Imp. |
